# Supplementary material
Source: Springer Nature journal article supplement (https://www.springermedizin.de/resource/supplementary/12885_2010_2750_MOESM4_ESM.pdf/9461886)

# CVX-2 ARK-2

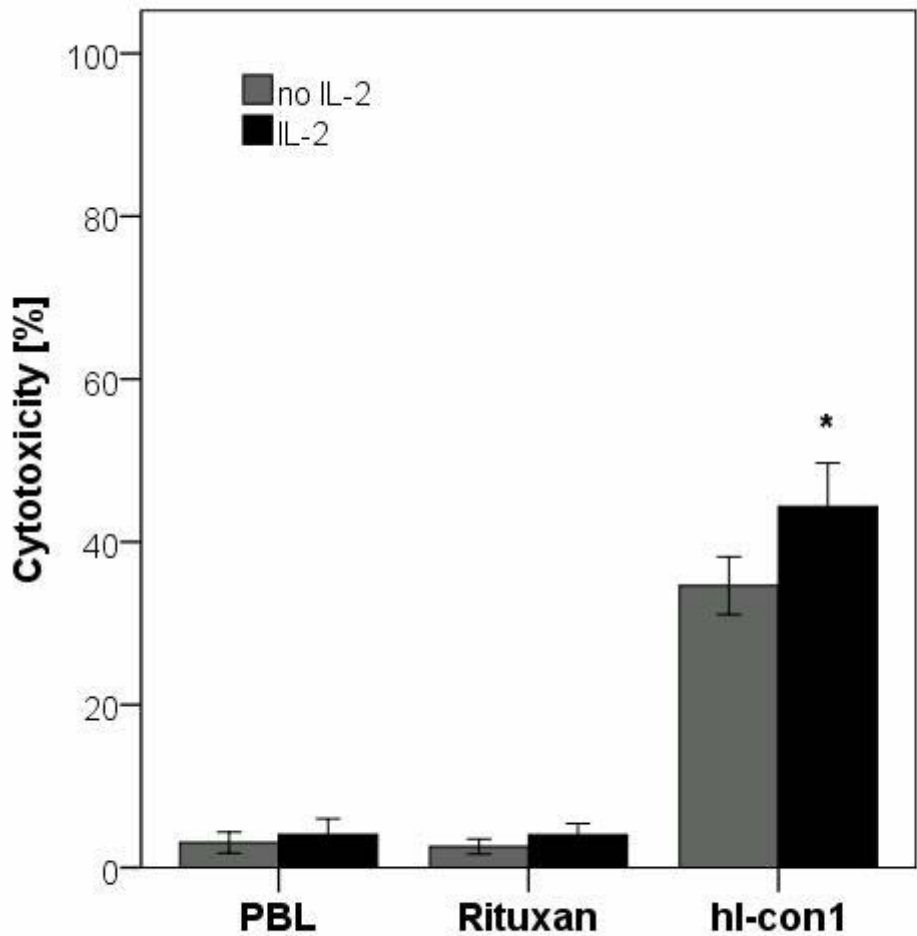

Supplement: MOESM4 [file 9461886]
